# Supplementary material for: Different evolutionary trends form the twilight zone of the bacterial pan-genome
Source: PubMed Central journal article supplement (PMC8715436; doi:10.1099/mgen.0.000670), 2021-09-24
Supplement: mgen-7-0670-s001.pdf [file mgen-7-0670-s001.pdf]

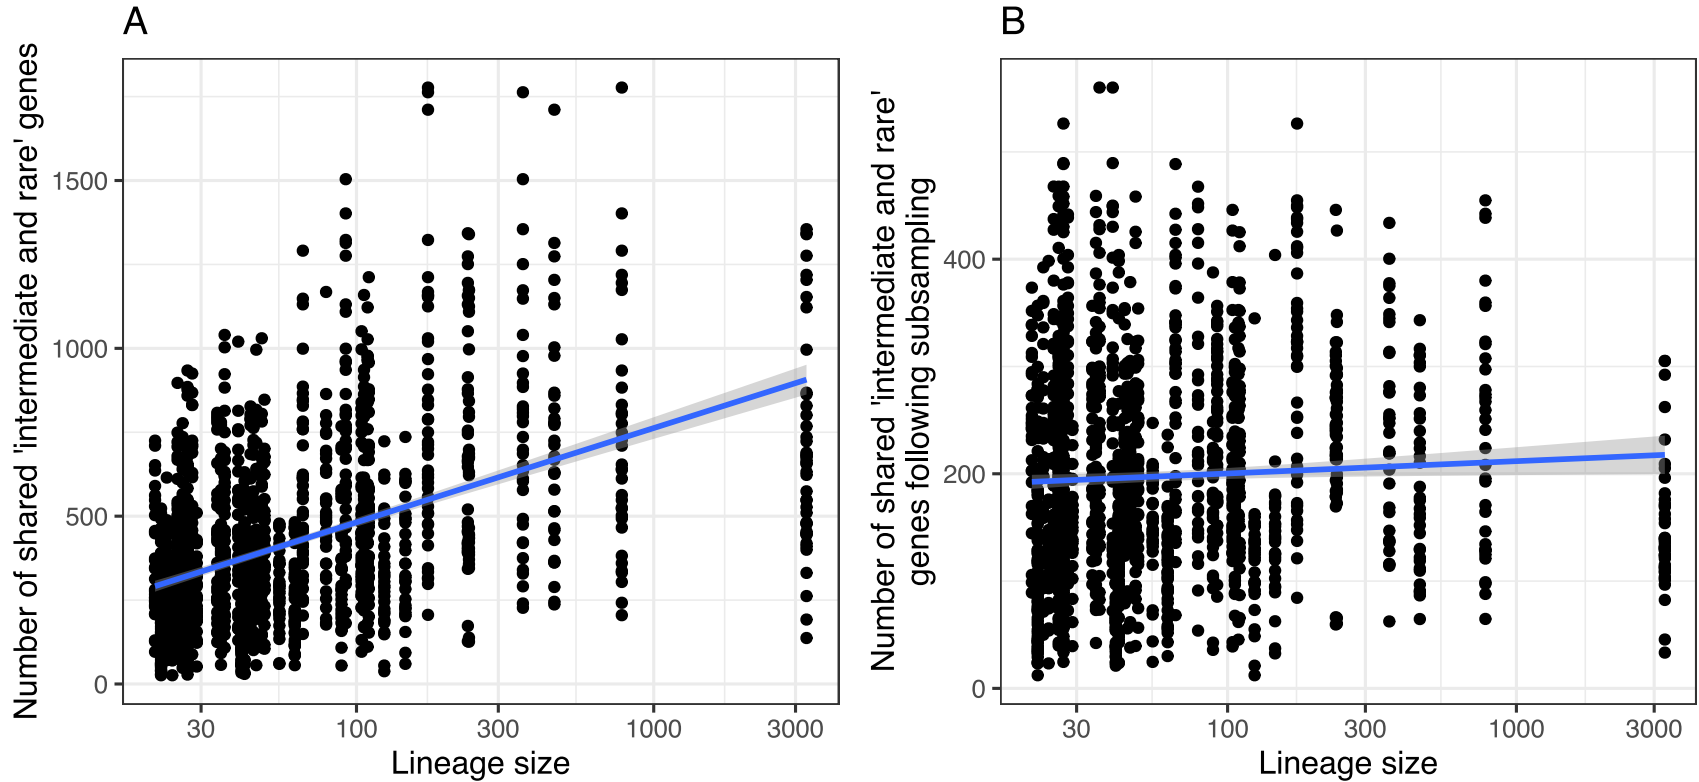

**Figure S1:** Lineage size correction for number of shared 'intermediate and rare' genes using lineage subsampling. A Original number of shared genes between every two lineages, relative to the size of the lineage (log<sub>10</sub>-transformed). Counts were only considered for lineages belonging to different phylogroups. Line fitted using linear regression,  $p < 2.2e-16$ ,  $R^2 = 0.22$ . B Number of shared 'intermediate and rare' genes, corrected by subsampling each lineage to a size of 20 and repeated 40 times. The count presented is mean number of shared 'intermediate and rare' genes across the 40 subsamples,  $p = 0.02$ ,  $R^2 = 0$ .

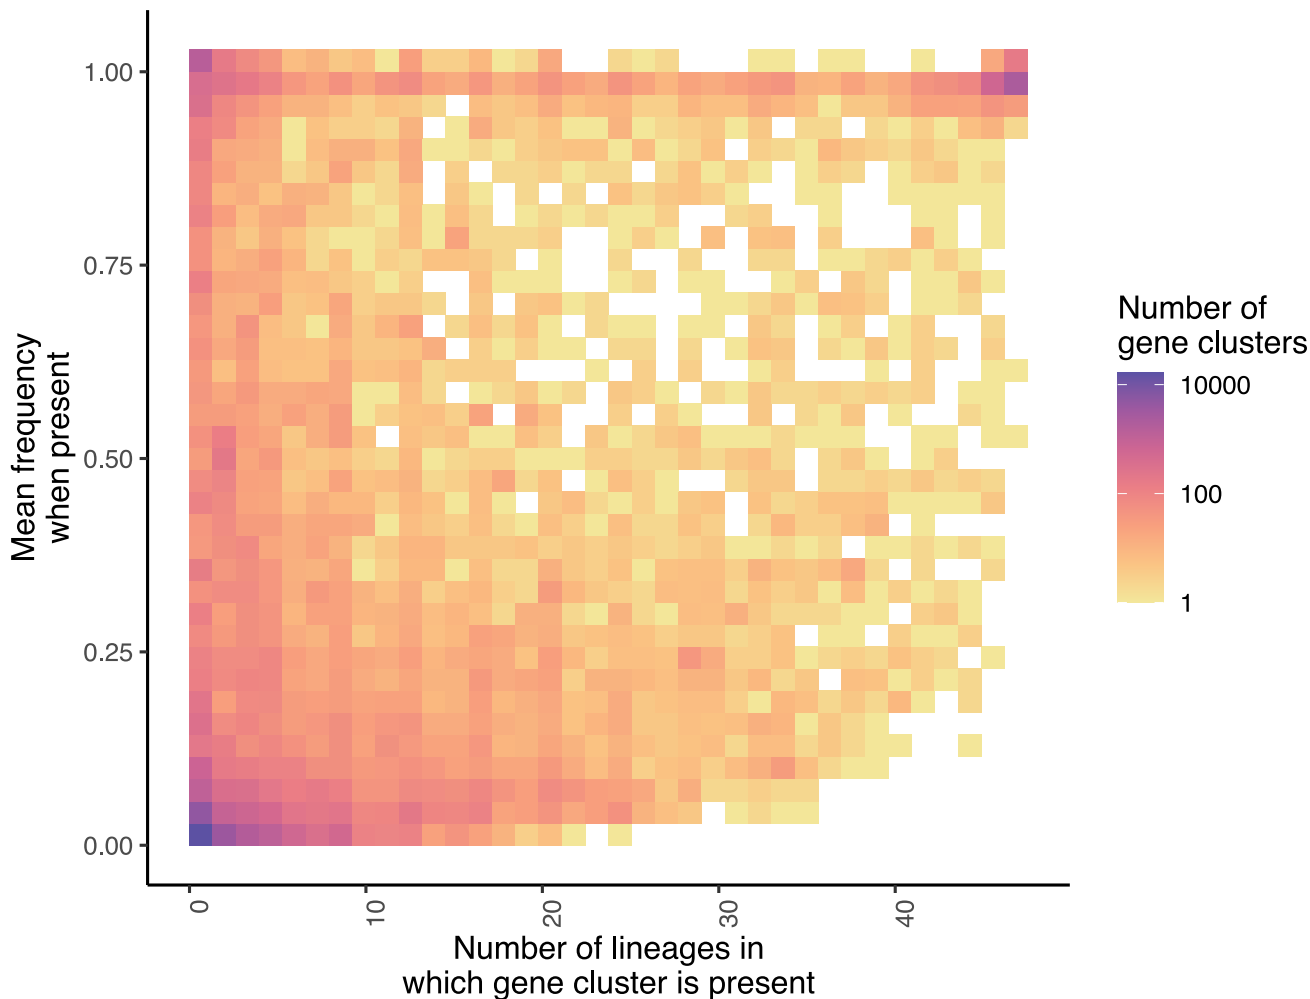

**Figure S2:** Density of all gene clusters of the *E. coli* pan-genome, presented as the number of lineages in which each gene was observed (x-axis) against the mean frequency across the lineages containing it (y-axis). Each square is coloured by the number of gene clusters with the values, log scaled.

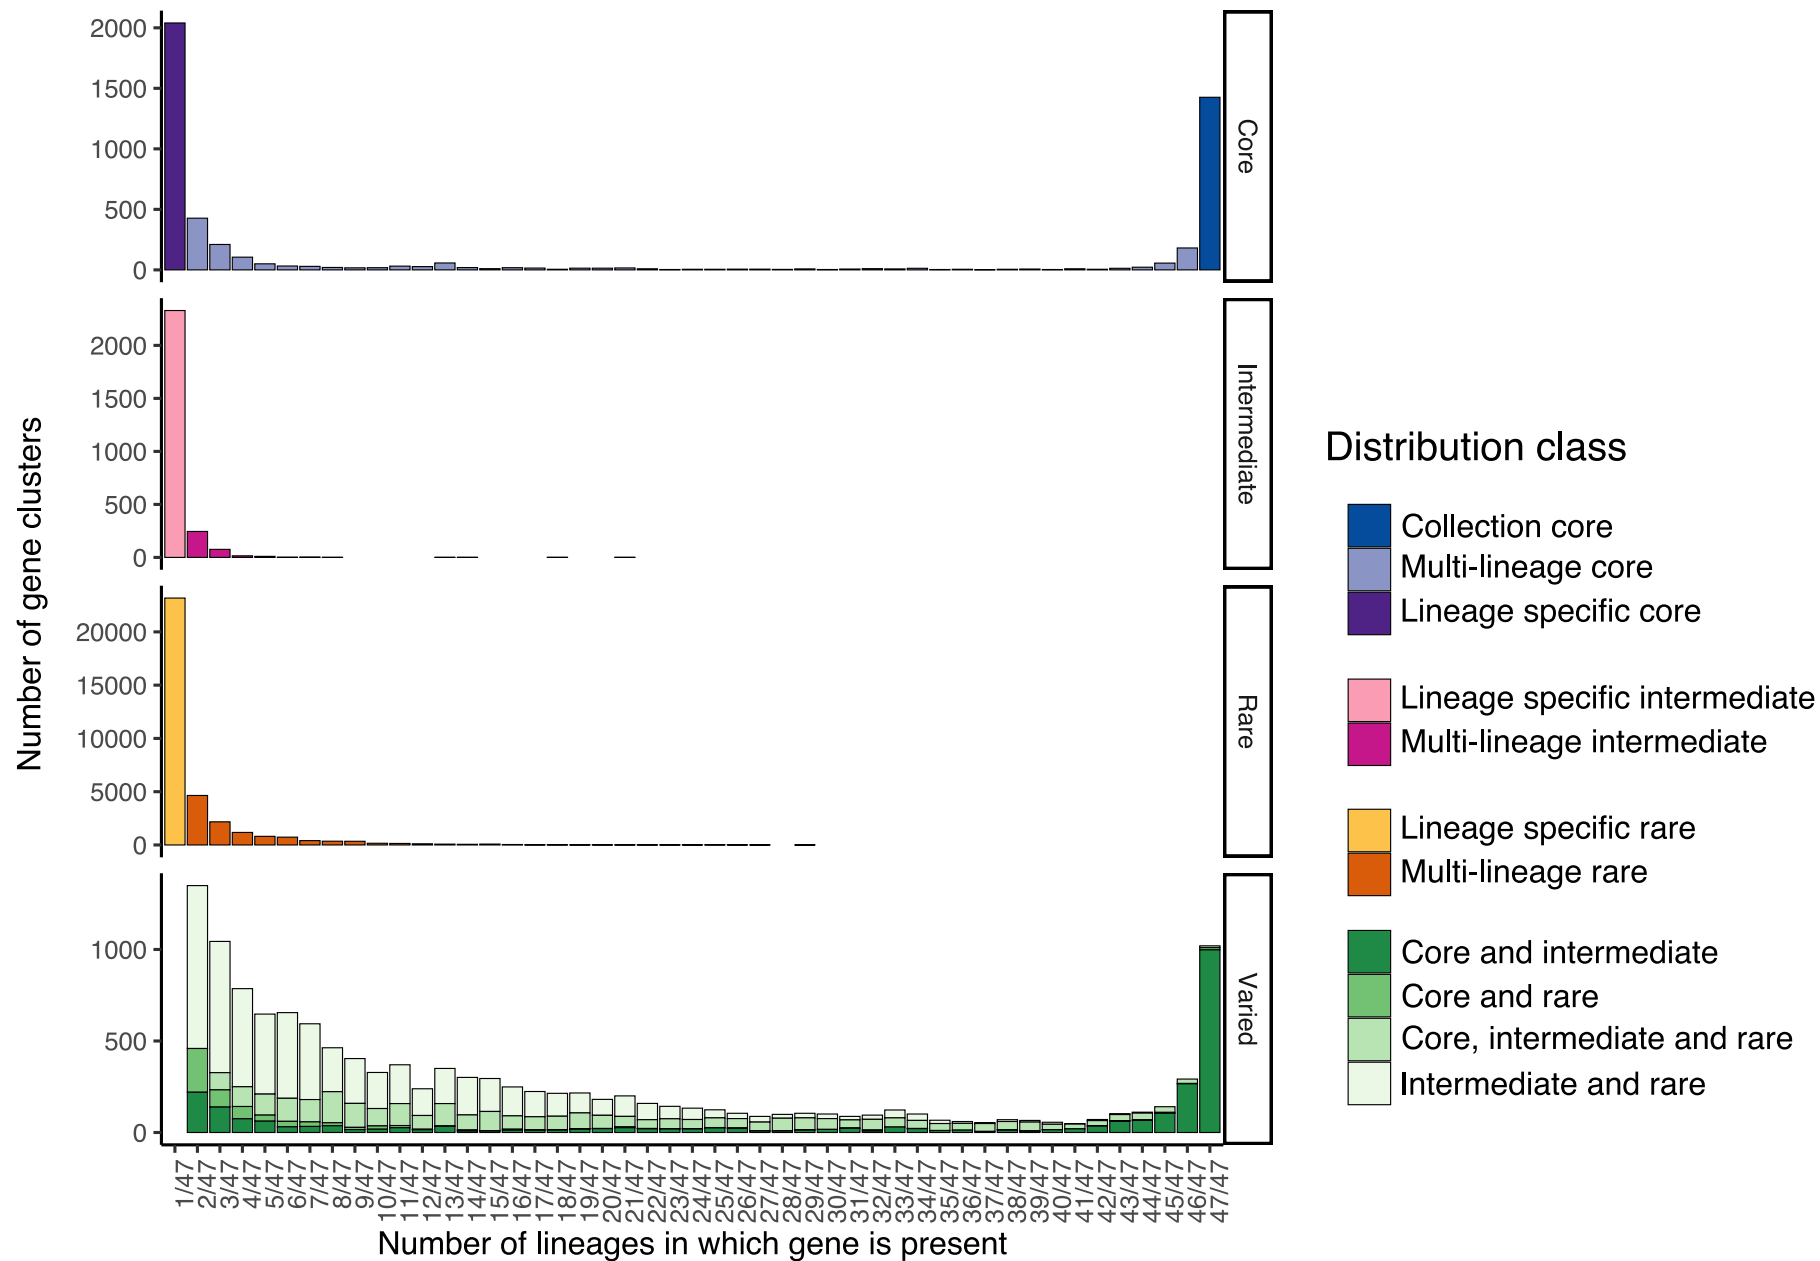

**Figure S3:** Distribution of the number of genes in each distribution class relative to the number of lineages in which they were found.

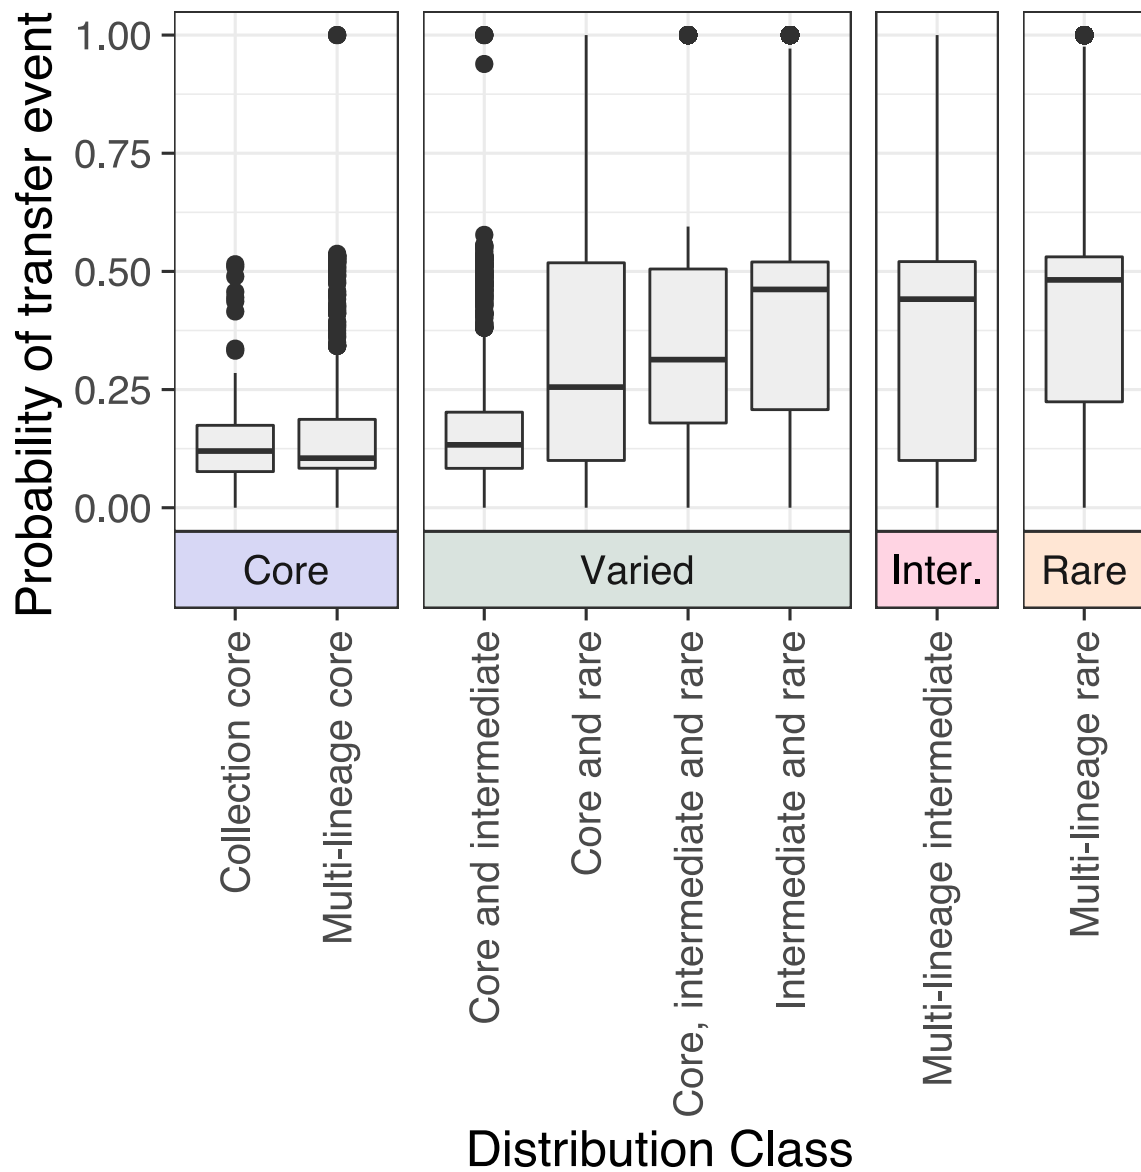

**Figure S4:** Inferred probability of transfer using gene tree/ species tree reconciliation for the genes belonging to the different distribution classes.

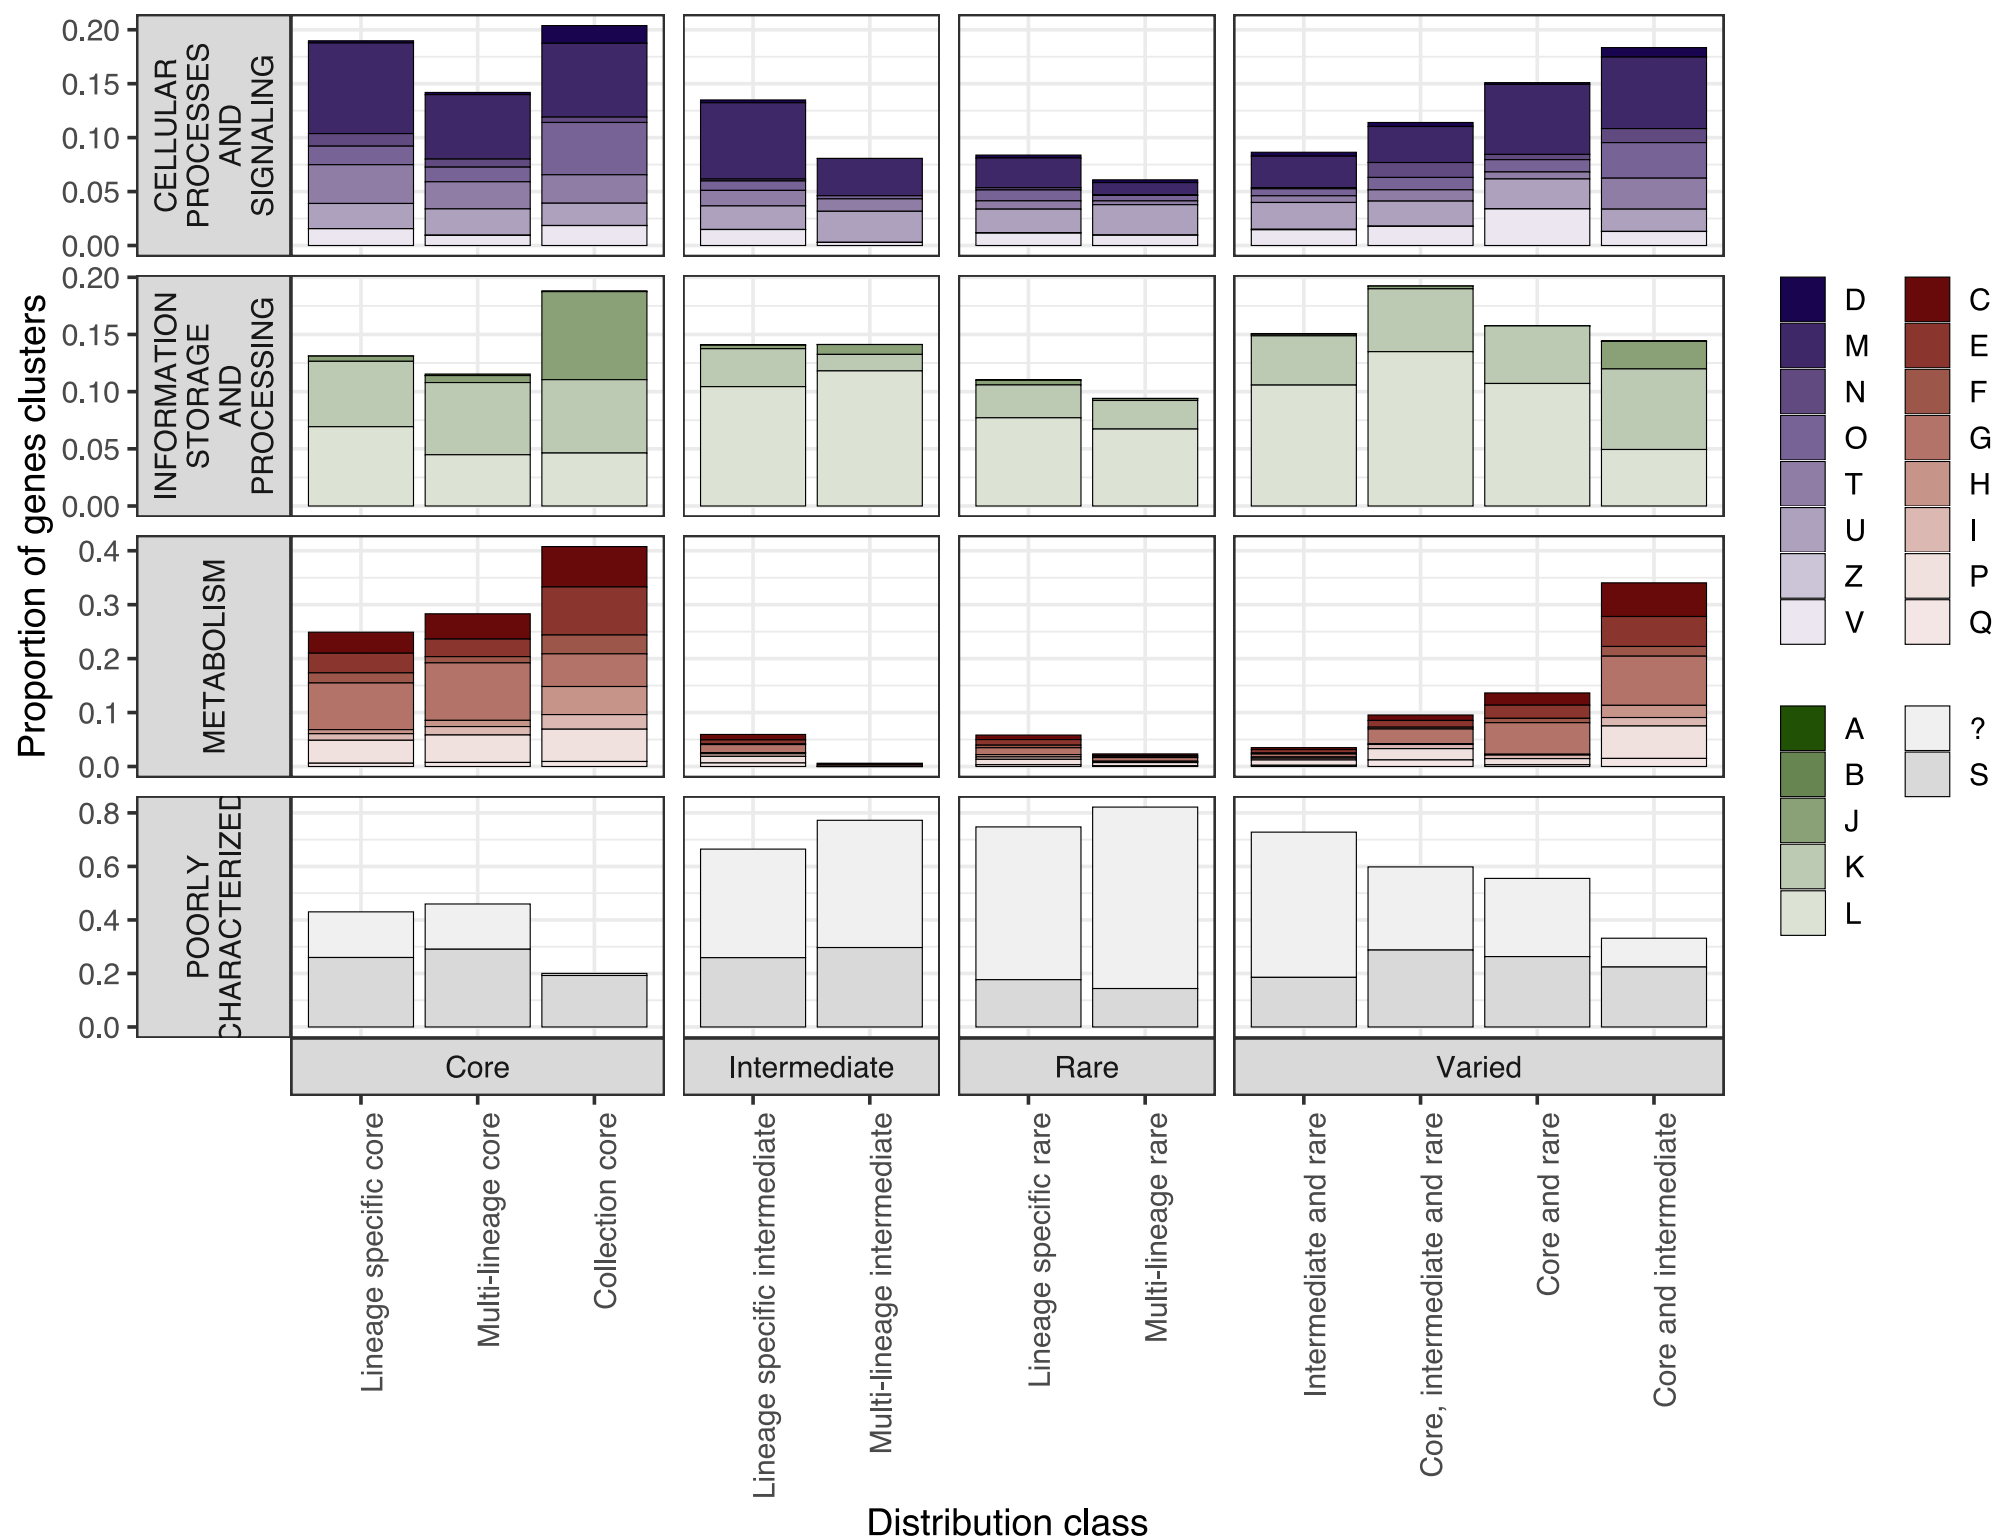

**Figure S5:** Fraction of genes from each occurrence class which were assigned each of the COG categories. D (Cell cycle control, cell division, chromosome partitioning), M ( Cell wall/membrane/envelope biogenesis), N (Cell motility), O (Post-translational modification, protein turnover, and chaperones), T (Signal transduction mechanisms), U (Intracellular trafficking, secretion, and vesicular transport), Z (Cytoskeleton), V (Defence mechanisms), A (RNA processing and modification), B (Chromatin structure and dynamics), J (Translation, ribosomal structure and biogenesis), K (Transcription), L (Replication, recombination and repair), C (Energy production and conversion), E (Amino acid transport and metabolism), F (Nucleotide transport and metabolism), G (Carbohydrate transport and metabolism), H (Coenzyme transport and metabolism), I (Lipid transport and metabolism), P (Inorganic ion transport and metabolism), Q (Secondary metabolites biosynthesis, transport, and catabolism), S (Function unknown) and “?” (unassigned).

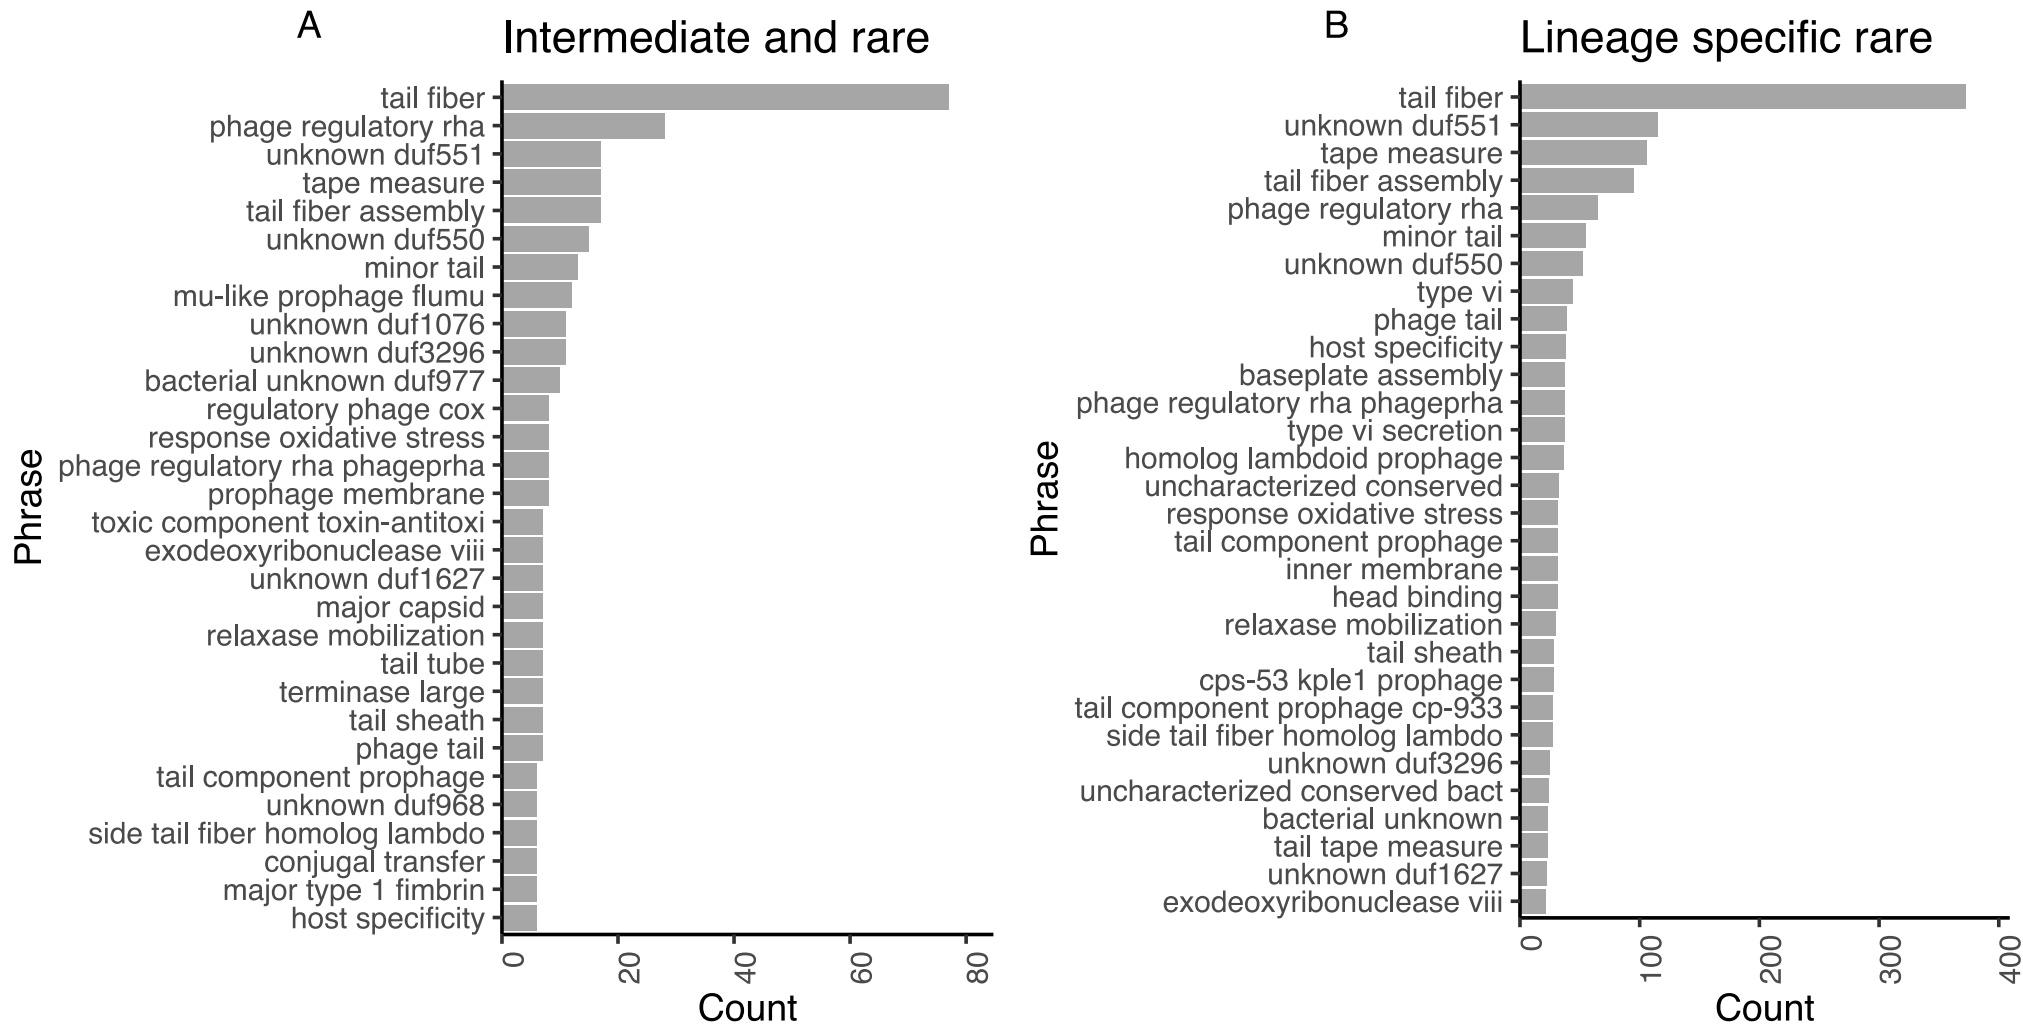

**Figure S6:** Top thirty predicted phrases for genes belonging to the “Poorly Characterised” COG category, for genes belonging to two low frequency distribution classes: ‘intermediate and rare’ genes (A) and ‘lineage-specific rare’ genes (B). The majority of the genes in these distribution classes were assigned a COG category of poorly characterised (Supplementary Figure S5).

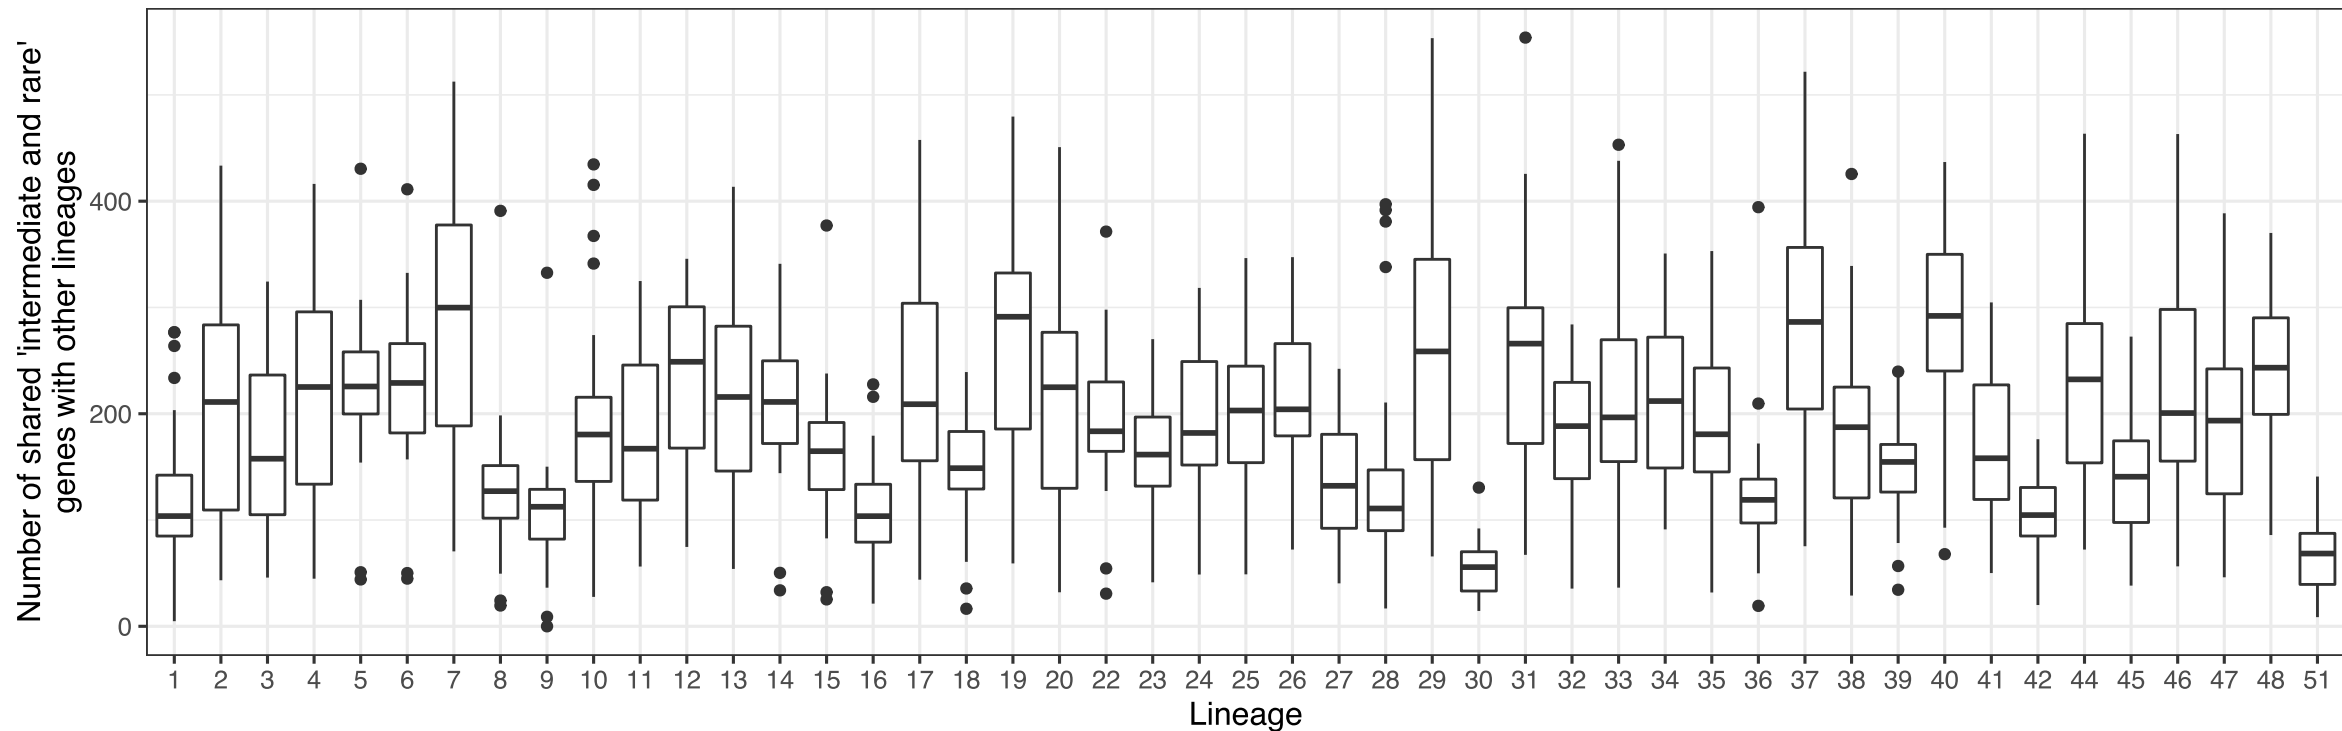

**Figure S7:** Number of shared intermediate and rare genes per isolate, for all lineages. Counts were only considered between lineages belonging to different phylogroups, and were calculated on a repeated subsampling of all lineage to correct for lineage size (Figure S1).

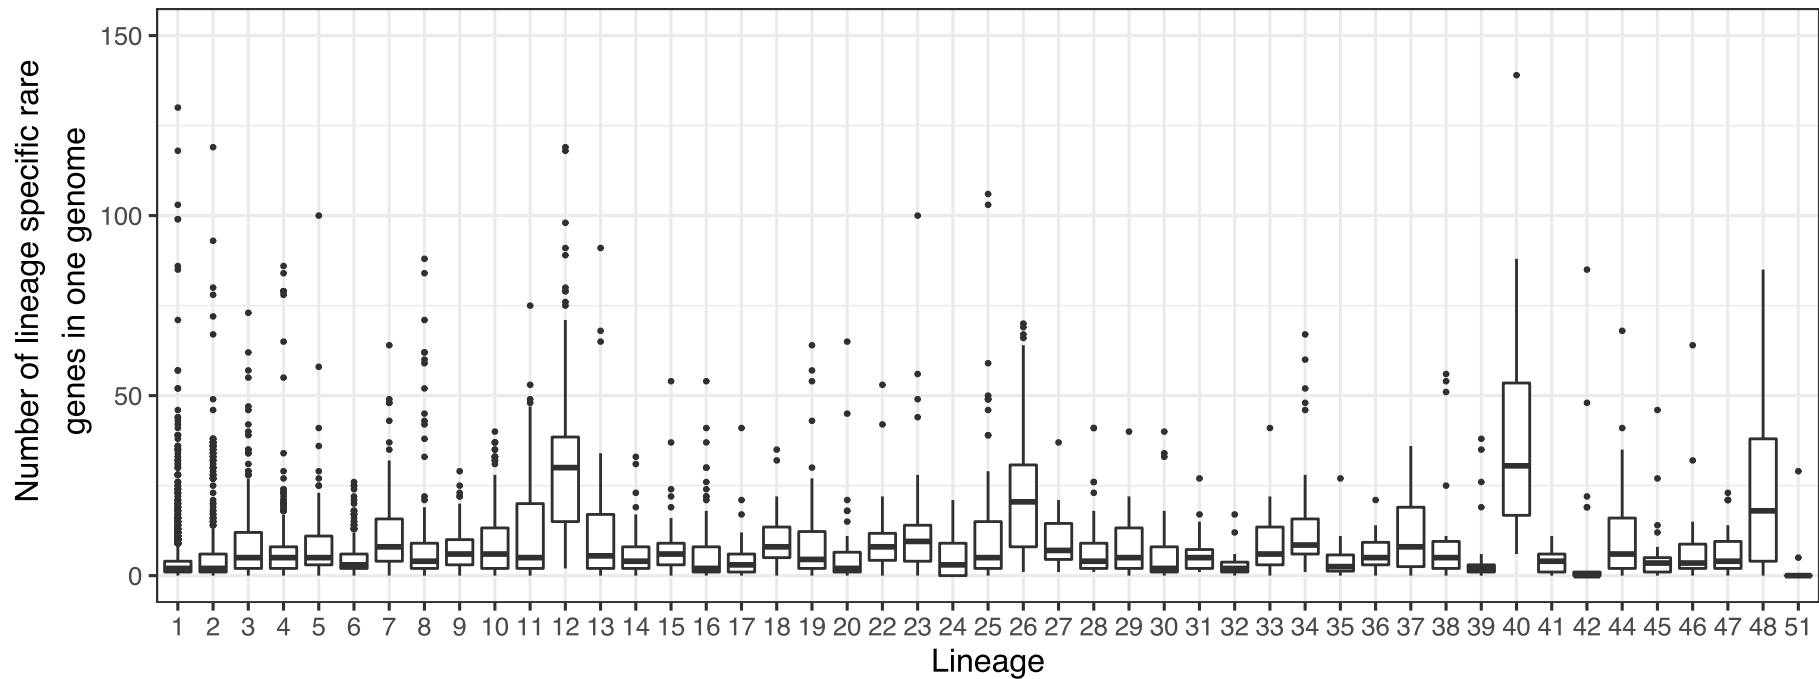

**Figure S8:** Number of 'lineage specific rare' genes observed in each isolate, for isolates belonging to each of the lineages
